# Supplementary material
Source: publisher site journal article supplement (https://www.dovepress.com/article/325553)
Supplement: Supplementary file 1 [file get_supplementary_file.php]

## SUPPLEMENTAL INFORMATION

**Title: TILRR (Toll-like interleukin-1 receptor regulator), an important modulator of inflammatory responsive genes, is circulating in the blood**

Mohammad Abul Kashem<sup>1,2,3,4</sup>, Xin-Yong Yuan<sup>4</sup>, Lin Li<sup>2</sup>, Joshua Kimani<sup>5</sup>, Francis A Plummer<sup>1††</sup>, Ma Luo<sup>1,2,4\*</sup>

**Authors' affiliation(s):**

<sup>1</sup>Department of Medical Microbiology and Infectious Diseases, University of Manitoba, Winnipeg, MB, Canada.

<sup>2</sup>JC Wilt Infectious Diseases Research Centre, Winnipeg, MB, Canada.

<sup>3</sup>Department of Microbiology and Veterinary Public Health, Chittagong Veterinary and Animal Sciences University, Chittagong, Bangladesh.

<sup>4</sup>National Microbiology Laboratory, Public Health Agency of Canada, Winnipeg, MB, Canada.

<sup>5</sup>Institute for Tropical and Infectious Diseases, University of Nairobi, Nairobi, Kenya.

**Running Title: TILRR is detected in blood**

†† In memoriam

\*Correspondence to: Ma Luo, PhD

JC Wilt Infectious Diseases Research Center, National Microbiology

Laboratory, 745 Logan Avenue, Winnipeg, MB, R3E 3L5, Canada;

Department of Medical Microbiology, University of Manitoba, Winnipeg, MB, Canada

Phone: 204-789-5072, Fax: 204-789-2018

Email: maluo@canada.ca, Ma.Luo@umanitoba.ca

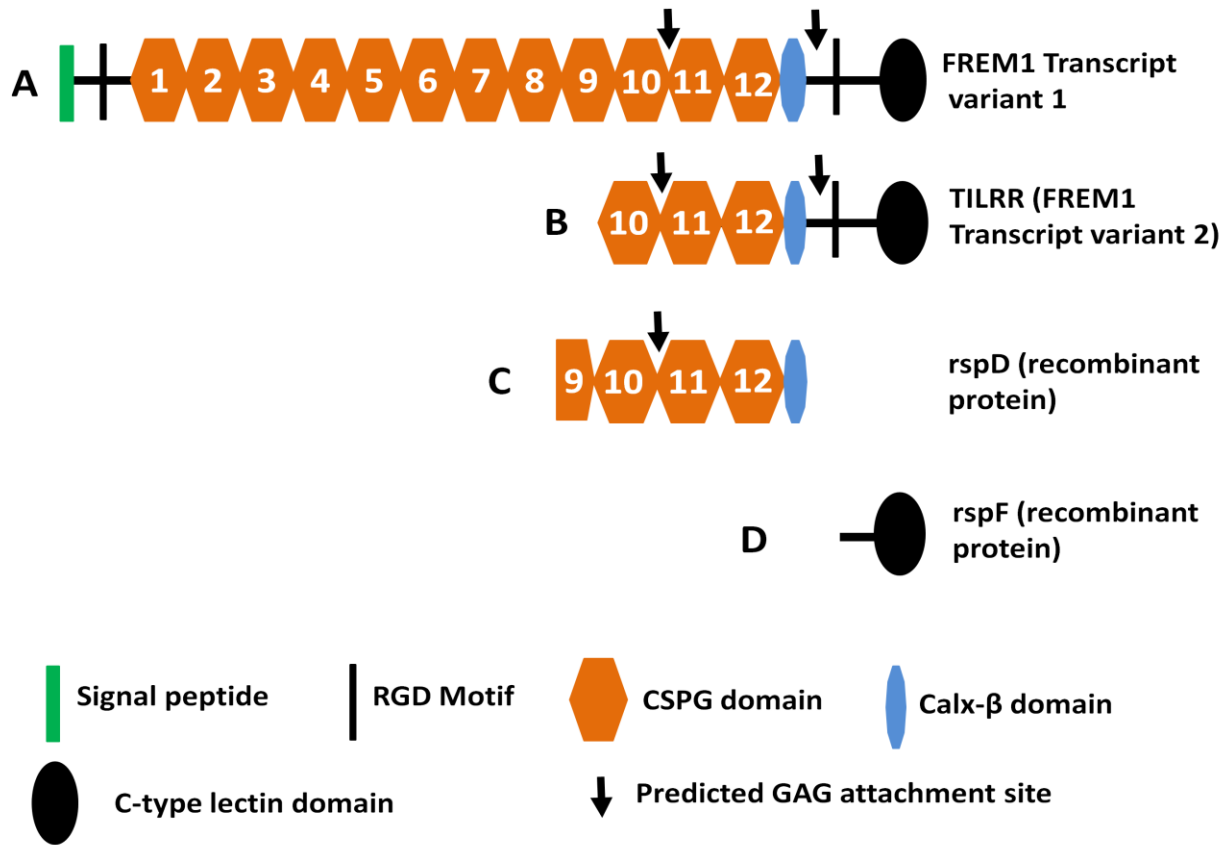

**Figure S1: Diagram of FREM1 variants and recombinant proteins.** A) Full-length FREM1 isoform 1; B) TILRR (FREEM1 isoform 2); C) rFREEM1 spD protein; and D) rFREEM1 spF protein. FREM1, Fras-related extracellular matrix 1; TILRR, toll-like interleukin 1 receptor regulator; RGD, arginine-glycine-aspartic acid; CSPG, chondroitin sulfate proteoglycan; and GAG, glycosaminoglycan. This figure was adapted from Yuan et al. with permission.<sup>1</sup>

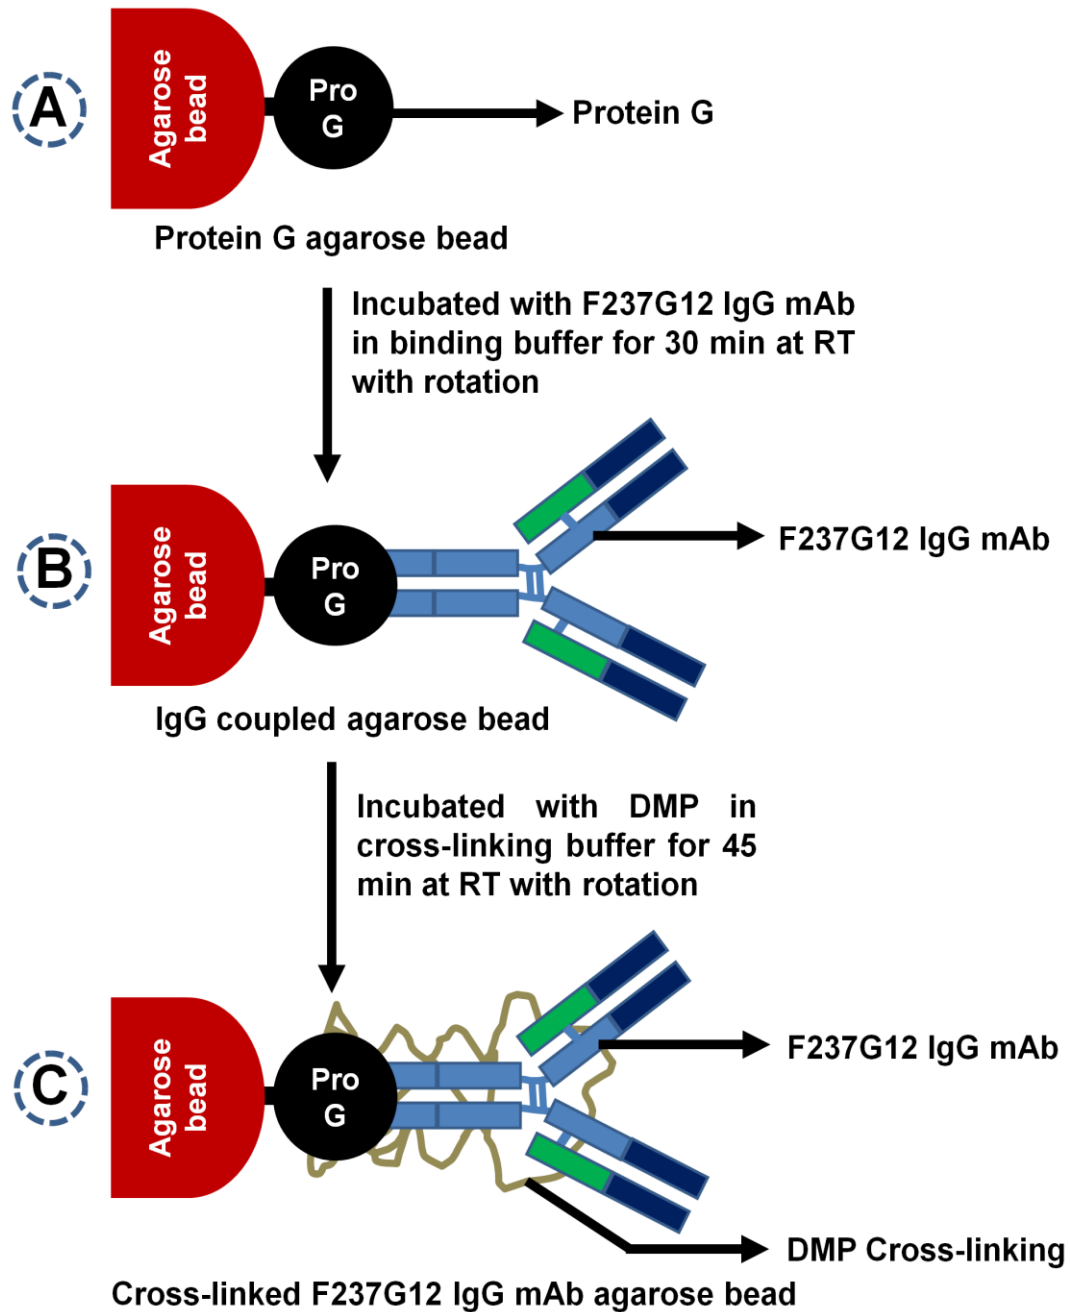

**Figure S2: Graphical representation of anti-FREM1 F237G12 IgG mAb cross-linking procedure with Protein G agarose beads.** A) Protein G coupled agarose bead, B) Protein G bound with Fc region of anti-FREM1 F237G12 mAb, C) Anti-FREM1 F237G12 mAb cross-linked with protein G agarose bead by DMP. FREM1, Fras-related extracellular matrix 1; mAb, monoclonal antibody; IgG, immunoglobulin G; DMP, Dimethyl pimelimidate dihydrochloride; and RT, room temperature.

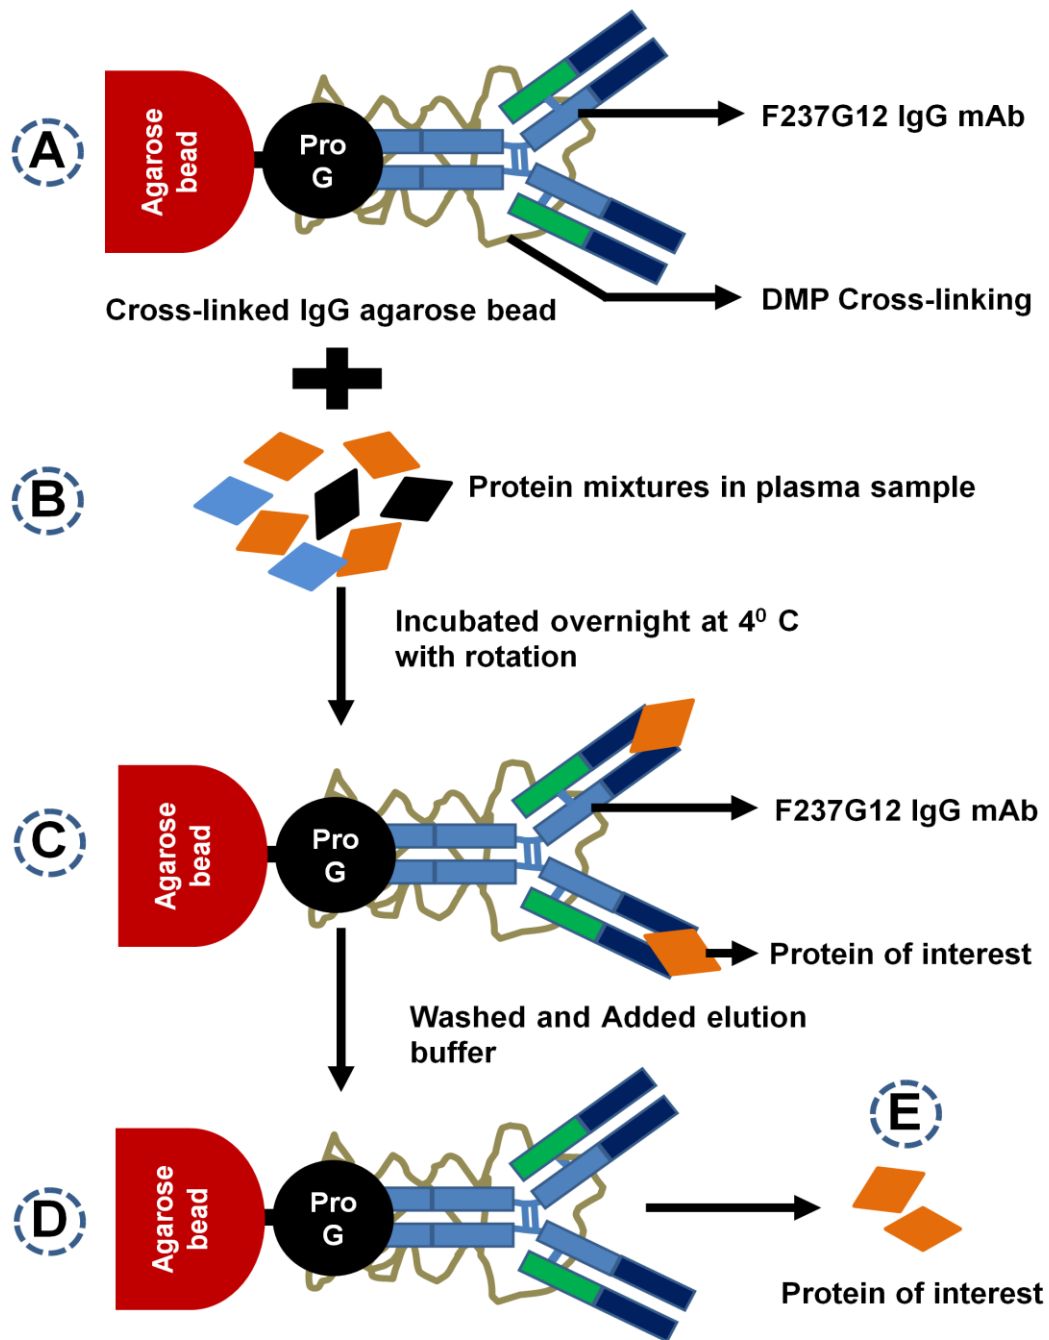

**Figure S3: Affinity purification procedure of TILRR protein.** A) Anti-FREM1 F237G12 mAb cross-linked protein G agarose bead, B) Mixture of proteins in plasma samples, C) Protein of interest (TILRR) bound with Fab region of anti-FREM1 mAb, D) Neutralized cross-linked anti-FREM1 mAb following affinity purification of target protein, E) Target protein (TILRR). FREM1, Fras-related extracellular matrix 1; TILRR, toll-like interleukin 1 receptor regulator; mAb, monoclonal antibody; IgG, immunoglobulin G; and DMP, Dimethyl pimelimidate dihydrochloride.

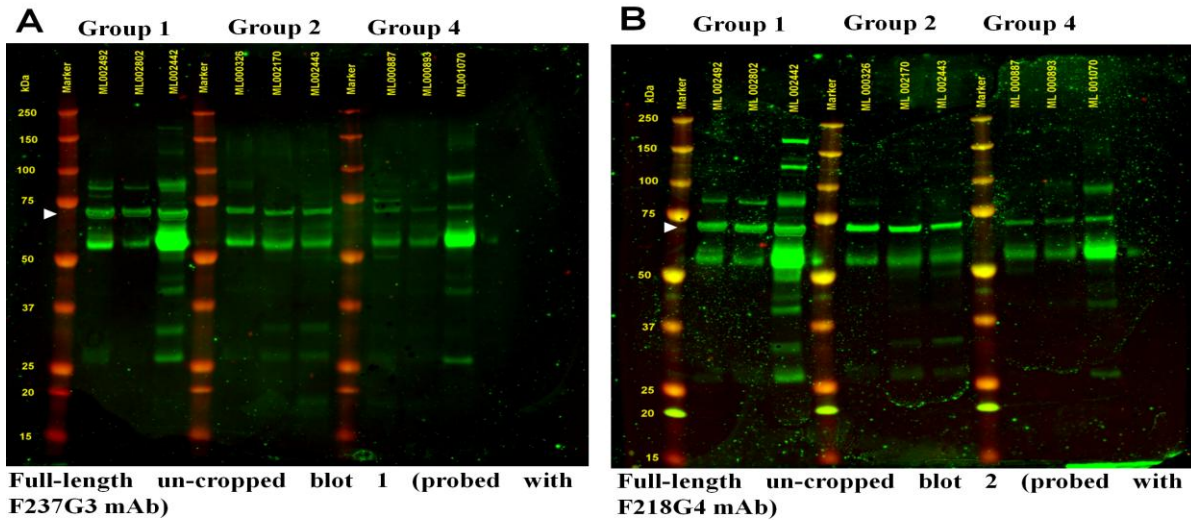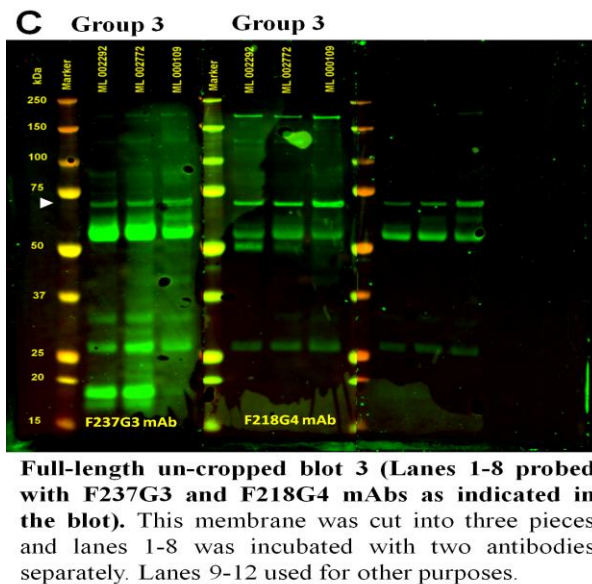

**Figure S4: Full-length un-cropped blots of Western blot analysis.** TILRR protein was confirmed by Western blot analysis in plasma of patients' group-1, -2, -3, and 4 (patient -1[ML002492], -2[ML002802], -3[ML002442], -4[ML000326], -5[ML002170], -6[ML002443], -7[ML2292], -8[ML2772], -9[ML000109], -10[ML000887], -11[ML000893], and -12[ML001070]) using affinity-purified protein (n=12; each group shows 3 patients data). The images show the bands in the blot for TILRR protein detected by two different anti-FREM1 IgG mAbs, such as F237G3 mAb (A), F218G4 mAb (B), whereas blot 3 (C) was cut in three slices and then probed with F237G3 mAb and F218G4 mAb separately as indicated. Western blot images were acquired by Odyssey CLx imaging system (LI-COR, USA) with auto channels (both 700 and 800), 42  $\mu$ m resolution, high image quality, and 0mm focal offset. A white-colored arrowhead indicates the 70 kDa-sized TILRR protein band. Other observed bands (<70kDa or >70 kDa) in the blot could be the additional variants of FREM1 (yet uncharacterized). Patients' ID# and groups are mentioned on the top of the blots. FREM1, Fras-related extracellular matrix 1; TILRR, toll-like interleukin 1 receptor regulator; ID#, identification number; and kDa, kiloDalton.

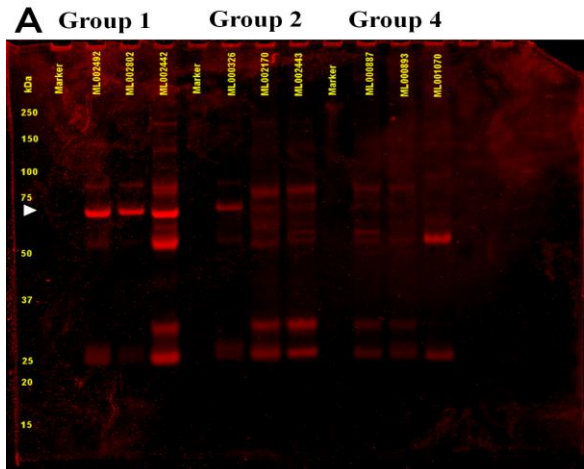

**A** Full-length un-cropped Gel 1 after transfer (used for F237G3 mAb)

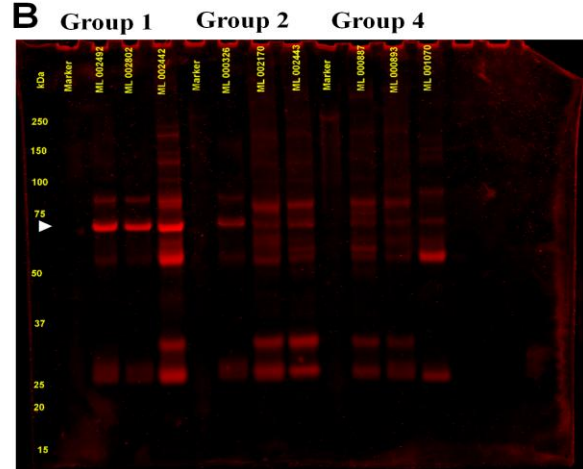

**B** Full-length un-cropped Gel 2 after transfer (used for F218G4 mAb)

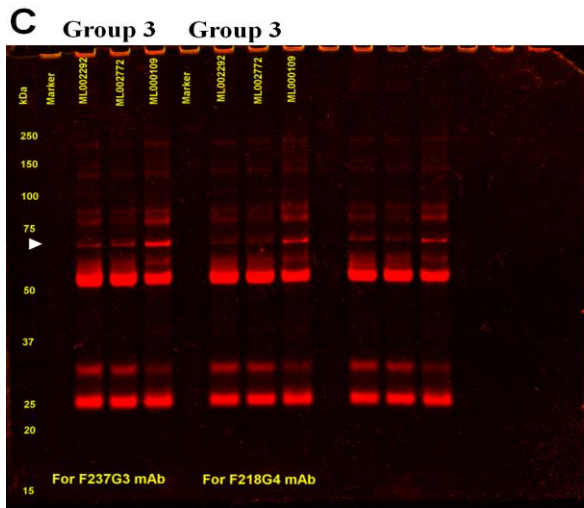

**C** Full-length un-cropped Gel 3 after transfer (Lanes 1-8 used for F237G3 and F218G4 mAbs as indicated in the gel). Lanes 9-12 used for other purposes.

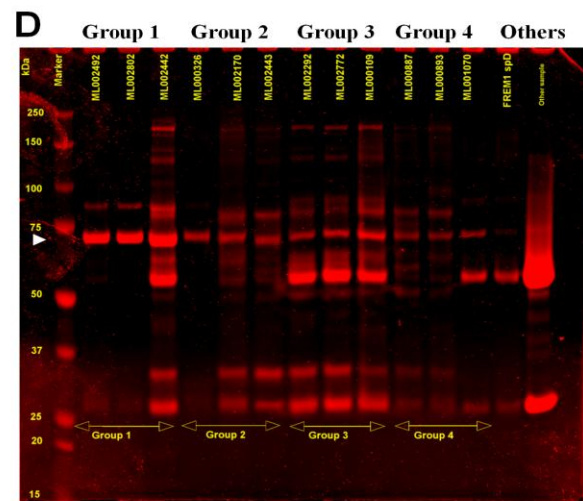

**D** Full-length un-cropped gel before iBlot transfer to the nitrocellulose membrane 3 after transfer (Lanes 14-15 used for other purposes)

**Figure S5: Full-length un-cropped gels of Coomassie blue staining.** Non-transferred proteins in the gel after and before iBlot transfer in plasma of patients' group-1, -2, -3, and 4 (patient -1[ML002492], -2[ML002802], -3[ML002442], -4[ML000326], -5[ML002170], -6[ML002443], -7[ML2292], -8[ML2772], -9[ML000109], -10[ML000887], -11[ML000893], and -12[ML001070]) (n=12; each group shows 3 patients data). Gels were used to transfer proteins onto Nitrocellulose membrane that was probed by F237G3 mAb (**A**), and F218G4 mAb (**B**), except Gel3 (**C**), which was used for both F237G3 and F218G4 mAbs. **D**) After the electrophoresis, the gel was directly stained with Coomassie blue staining without transferring to Nitrocellulose membrane. The images show the bands in the gel for the different proteins including a 70 kDa TILRR protein (White-colored arrowhead). Coomassie blue staining gel images were acquired by Odyssey CLx imaging system (LI-COR, USA) with auto channel (700 channel), 42  $\mu$ m resolution, high image quality, and 0.5mm focal offset. Patients' ID# and groups are mentioned on the top of the blots. ID#, identification number; and kDa, kiloDalton.

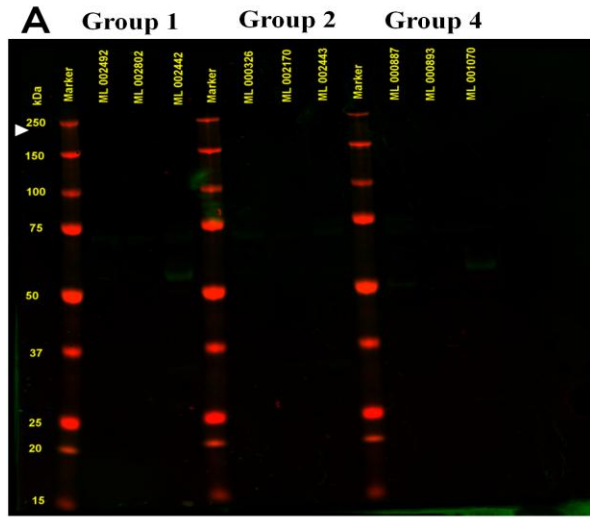

**A** Full-length un-cropped blot 1 (probed with F237G1 mAb)

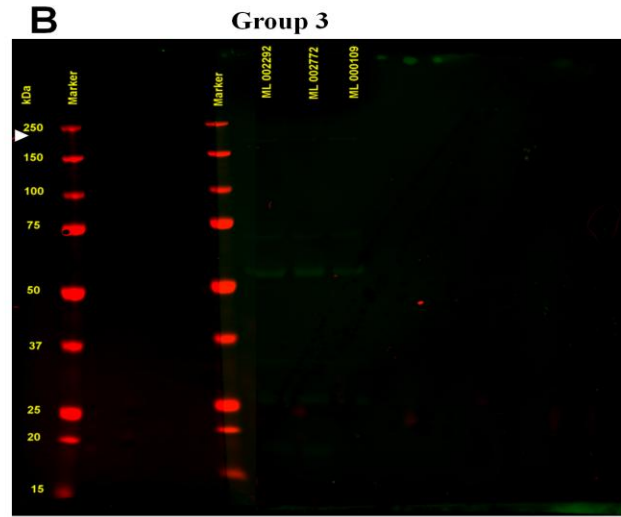

**B** Full-length un-cropped blot 2 (probed with F237G1 mAb). Lanes 1-4 used for other purposes.

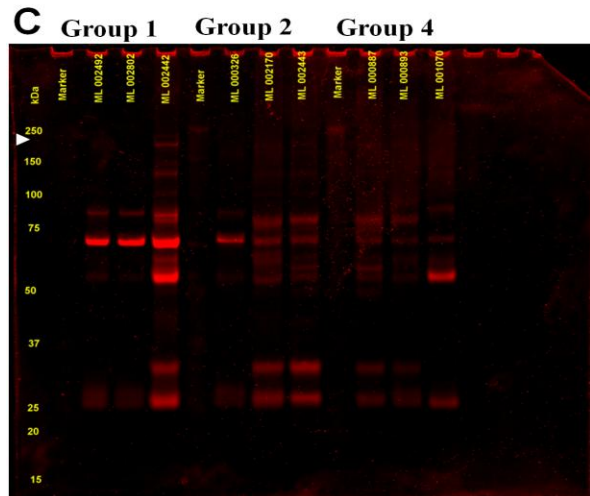

**C** Full-length un-cropped Gel 1 after transfer (used for F237G1 mAb)

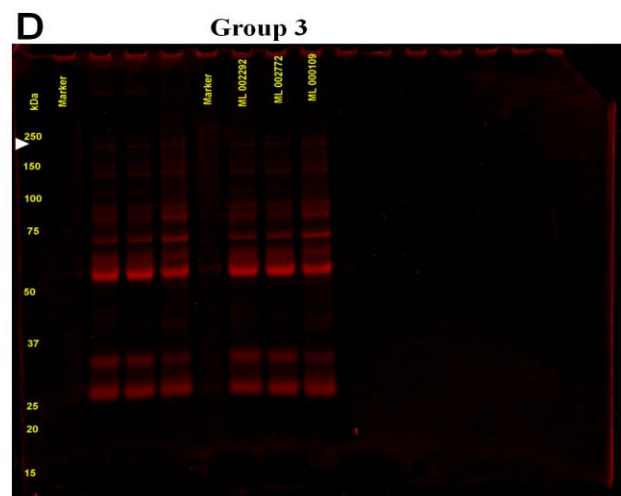

**D** Full-length un-cropped Gel 2 after transfer (used for F237G1 mAb). Lanes 1-4 used for other purposes.

**Figure S6: Western blot verification of full-length FREM1 protein after affinity purification.** The blot was separately probed with primary antibody (anti-FREM1 mAb F237G1 targeting CSPG9 domain of FREM1) to identify the full-length FREM1 protein from affinity-purified protein of patients' plasma (patient -1[ML002492], -2[ML002802], -3[ML002442], -4[ML000326], -5[ML002170], -6[ML002443], -7[ML2292], -8[ML2772], -9[ML000109], -10[ML000887], -11[ML000893], and -12[ML001070]). **A-B)** Figure A shows the blot for group-1, -2, and -4 and Figure B for group-3. No band of ~235 kDa was detected (indicated by a white-colored arrowhead). **C-D)** Corresponding gels were used to transfer proteins onto the nitrocellulose membrane. Western blot and Coomassie blue staining images were acquired by Odyssey CLx imaging system (LI-COR, USA) with auto channels (both 700 and 800), 42  $\mu$ m resolution, high image quality, and 0 mm focal offset for blots and 0.5 mm focal offset for gels. Patients' ID# and groups are mentioned on the top of the blots. FREM1, Fras-related extracellular matrix 1; ID#, identification number; and kDa, kiloDalton.

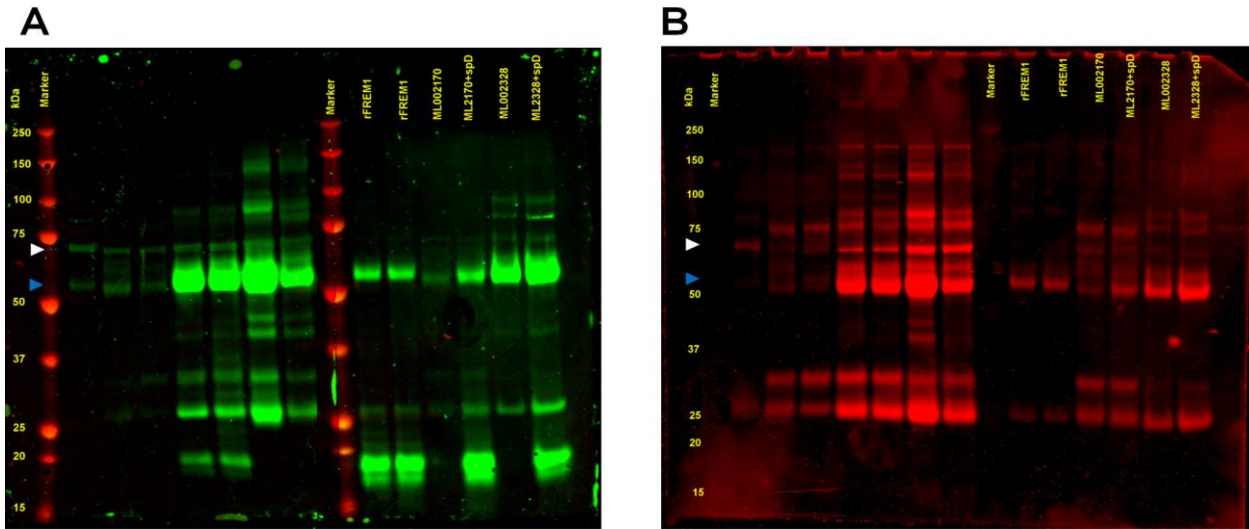

**Full-length un-cropped blot (Lanes 9-15 probed with F237G3 mAb).** Lanes 1-8 used for other purposes. This membrane was cut into two pieces and lanes 9-15 were incubated with F237G3 mAb.

**Full-length un-cropped Gel after transfer (Lanes 9-15 used for F237G3 mAb).** Lanes 1-8 used for other purposes.

**Figure S7: Full-length un-cropped blot and gel.** **A)** The blot was cut into two pieces and the second piece was incubated with anti-FREM1 F237G3 mAb. A clear band of ~57 kDa (blue-colored arrowhead) rFREM1 spD was observed in all samples. A 70 kDa band (white-colored arrowhead) of TILRR protein is also observed in plasma alone and plasma with spiked rFREM1 spD protein. **B)** Corresponding gel following iBlot transfer onto Nitrocellulose membrane stained with Coomassie blue. The white arrowhead indicates 70kDa and the blue arrowhead represents ~57 kDa. Western blot and Coomassie blue staining images were acquired by Odyssey CLx imaging system (LI-COR, USA) with auto channels (both 700 and 800), 42  $\mu$ m resolution, high image quality, and 0 mm focal offset for blot and 0.5 mm focal offset for gel. Patients' ID# and groups are mentioned on the top of the blots. FREM1, Fras-related extracellular matrix 1; ID#, identification number; and kDa, kiloDalton.



**Table S1: Demographic characteristics of the study subjects**

| Characteristics<br>(at sample<br>collection) | All subjects<br>(n=640)<br>Median (IQR) | Plasma group 1<br>(n=186)<br>Median (IQR) | Plasma group 2<br>(n=303)<br>Median (IQR) | Plasma group 3<br>(n=19)<br>Median (IQR) | Plasma group 4<br>(n=132)<br>Median (IQR) | p-value                                                              |
|----------------------------------------------|-----------------------------------------|-------------------------------------------|-------------------------------------------|------------------------------------------|-------------------------------------------|----------------------------------------------------------------------|
| Age, in years                                | 35 (30-40)<br>(n=624 <sup>a</sup> )     | 33 (28.5-37)<br>(n=179)                   | 35 (30-40)<br>(n=297)                     | 35 (30-38.75)<br>(n=18)                  | 39 (33-45)<br>(n=130)                     | 0.0142 <sup>b</sup><br><0.0001 <sup>c,d</sup><br>0.0147 <sup>e</sup> |
|                                              | <b>% (n)</b>                            | <b>% (n)</b>                              | <b>% (n)</b>                              | <b>% (n)</b>                             | <b>% (n)</b>                              |                                                                      |
| Sexually transmitted infection (STIs)        | 27.00<br>(172/637 <sup>f</sup> )        | 29.03<br>(54/186)                         | 24.67<br>(74/300)                         | 42.11<br>(8/19)                          | 28.03<br>(37/132)                         | NS                                                                   |
| Genital ulcer                                | 6.12<br>(39/637 <sup>g</sup> )          | 5.91<br>(11/186)                          | 3.67<br>(11/300)                          | 15.79 (3/19)                             | 10.61<br>(14/132)                         | 0.0124 <sup>h</sup><br>0.0044 <sup>i</sup>                           |
| Oral contraceptive used                      | 22.45<br>(143/637 <sup>g</sup> )        | 20.43<br>(38/186)                         | 21.00<br>(63/300)                         | 31.58<br>(6/19)                          | 27.27<br>(36/132)                         | NS                                                                   |

<sup>a</sup>Samples with known age at the time of collection. Age was unknown for 16-samples.  
<sup>b</sup>Student t-test was conducted between group 1 and group 2.  
<sup>c</sup>Student t-test was conducted between group 1 and group 4.  
<sup>d</sup>Student t-test was conducted between group 2 and group 4.  
<sup>e</sup>Student t-test was conducted between group 3 and group 4.  
<sup>f</sup>Samples with a history of known STIs (Gonorrhea, Syphilis, Chlamydial infection, and bacterial vaginosis). 3-samples do not have a history of STIs.  
<sup>g</sup>Samples with a history of vaginal discharge, genital ulcer, and use of oral contraceptives. History was unknown for 3-samples.  
<sup>h</sup>Chi-Square test was conducted between group 2 and group 3.  
<sup>i</sup>Chi-Square test was conducted between group 2 and group 4.  
IQR, interquartile range; n, sample#; NS, not statistically significant

## REFERENCES

1. Yuan XY, Liu LR, Krawchenko A, et al. Development of monoclonal antibodies to interrogate functional domains and isoforms of FREM1 protein. *Monoclon Antib Immunodiagn Immunother*. Apr 2014;33(2):129-140.
